# Supplementary material for: Tissue factor pathway inhibitor-2 is specifically expressed in ovarian clear cell carcinoma tissues in the nucleus, cytoplasm and extracellular matrix
Source: PubMed Central journal article supplement — Oncol Rep. 2021 Jan 20;45(3):1023–32. doi: 10.3892/or.2021.7944 (PMC7859994; doi:10.3892/or.2021.7944), 2021-01-20
Supplement: Supplementary_Data.pdf [file Supplementary_Data.pdf]

Figure S1. Representative images of H-score assessment. Cytoplasmic and nuclear staining of TFPI-2 in OCCC tissues were evaluated, respectively. H-score was calculated as sum of 1 x (percentage of 1+ cells), 2 x (percentage of 2+ cells) and 3 x (percentage of 3+ cells). After enclosing tumor area (black line), Aperio's annotation software (Aperio Cytoplasm Algorithm) identified the cytoplasm and nucleus and classified the signal intensity into 4 levels from 0 (yellow) to 3+ (brown) for cytoplasmic intensity and 0 (cyan) to 3+ (dark blue) for nuclear intensity as shown at the bottom of the panels. Upper panels are IHC image and lower panels are images processed by the software. Left: A representative image of TFPI-2-negative staining (H-score: Cytoplasm 0, nucleus 0). Right: A representative image of TFPI-2-positive staining (H-score: Cytoplasm 57, nucleus 116). TFPI-2, tissue factor pathway inhibitor-2; OCCC, ovarian clear cell carcinoma.

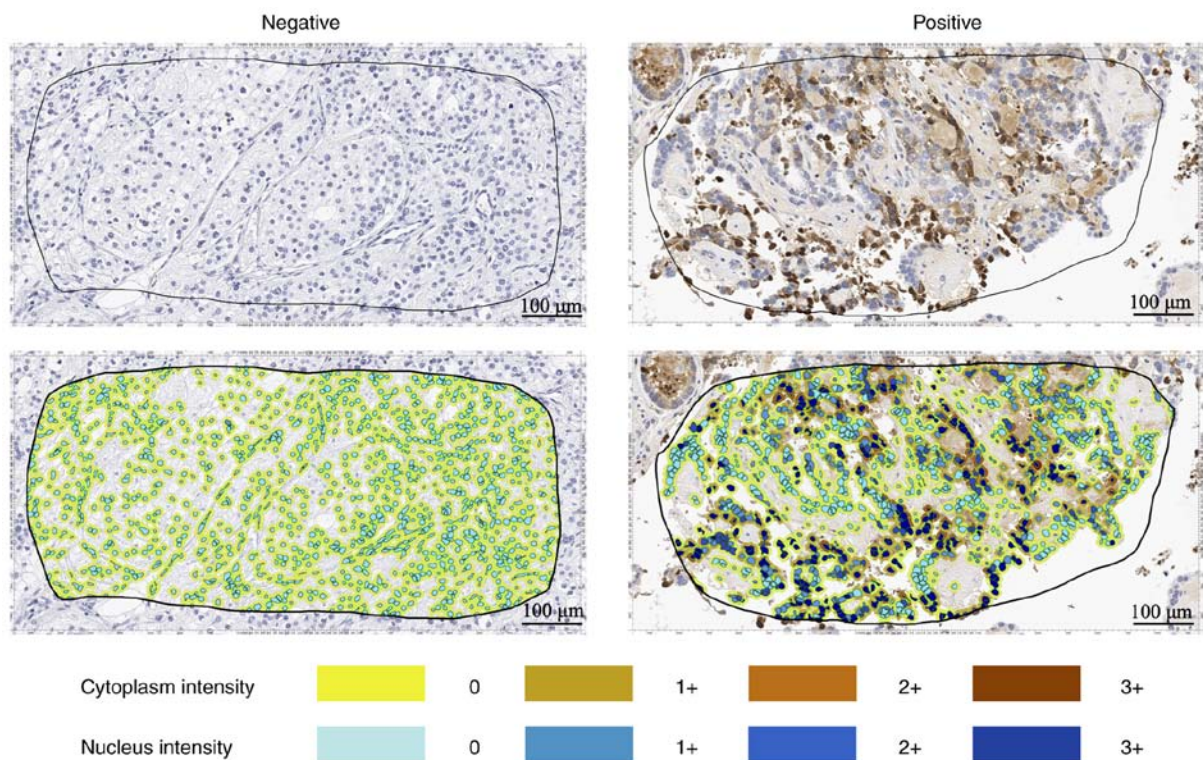

Figure S2. A Venn diagram of TFPI-2 staining pattern in the OCCC cases. Of all 77 OCC cases, 10 (12.9%) cases were nuclear positive (blue circle), 35 (45.5%) cases were cytoplasmic positive (yellow circle) and 35 (45.5%) cases were ECM positive (pink circle). Fifty-two cases (67.5%) were positive in any one of the 3 locations. Twenty-five cases were negative in any locations. TFPI-2, tissue factor pathway inhibitor-2; OCCC, ovarian clear cell carcinoma; ECM, extracellular matrix.

Negative (25)

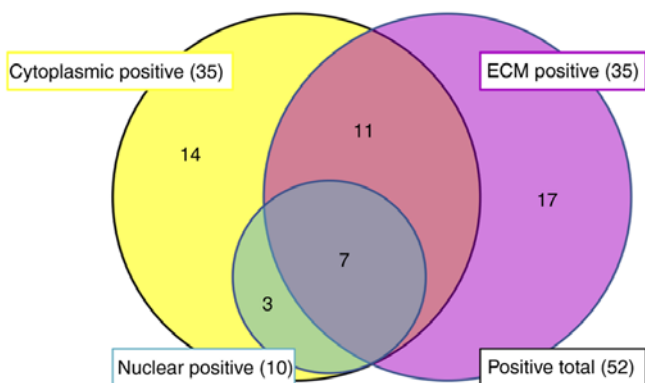

Figure S3. Relationship between cytoplasmic TFPI-2 level and 5-year overall survival evaluated by Kaplan-Meier analysis. TFPI-2 expression was evaluated in each fraction. (A) Cytoplasm. (B) Nucleus. (C) ECM. (D) Any fraction. TFPI-2, tissue factor pathway inhibitor-2; ECM, extracellular matrix.

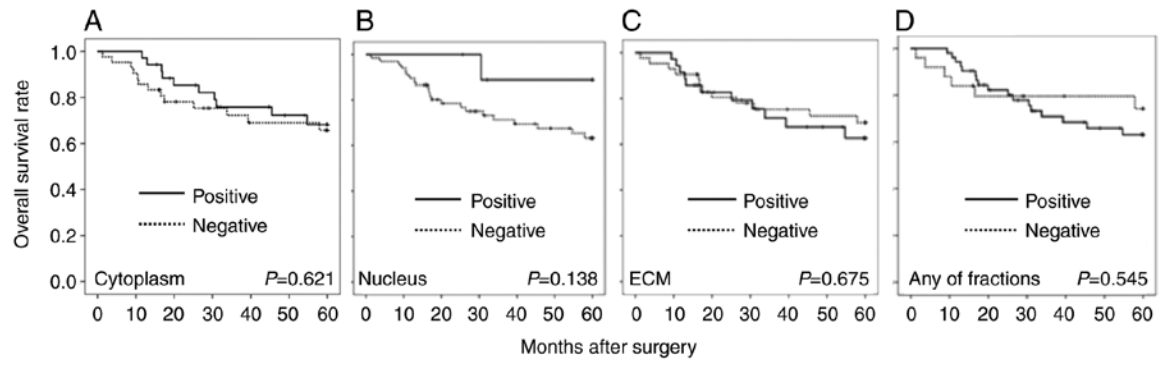

Table SI. Multivariate analysis of 5-year overall survival for cases grouped according to the subcellular localization of TFPI-2 expression in samples analyzed by IHC.

| Localization         | Variable                                  | HR    | 95% CI          | P-value |
|----------------------|-------------------------------------------|-------|-----------------|---------|
| Cytoplasm            | Age (year)                                | 1.013 | 0.974 to 1.053  | 0.526   |
|                      | Staging (FIGO I/II vs. III/IV)            | 6.268 | 2.688 to 14.613 | <0.001  |
|                      | TFPI-2 expression (negative vs. positive) | 1.149 | 0.488 to 2.705  | 0.751   |
| Nucleus              | Age (year)                                | 1.011 | 0.972 to 1.051  | 0.593   |
|                      | Staging (FIGO I/II vs. III/IV)            | 5.488 | 2.358 to 12.771 | <0.001  |
|                      | TFPI-2 expression (negative vs. positive) | 0.456 | 0.058 to 3.582  | 0.456   |
| ECM                  | Age (year)                                | 1.016 | 0.975 to 1.059  | 0.440   |
|                      | Staging (FIGO I/II vs. III/IV)            | 6.251 | 2.728 to 14.325 | <0.001  |
|                      | TFPI-2 expression (negative vs. positive) | 1.382 | 0.582 to 3.282  | 0.463   |
| Any of the fractions | Age (year)                                | 1.020 | 0.979 to 1.063  | 0.440   |
|                      | Staging (FIGO I/II vs. III/IV)            | 6.904 | 2.947 to 16.176 | <0.001  |
|                      | TFPI-2 expression (negative vs. positive) | 0.193 | 0.715 to 5.273  | 0.193   |

Cox regression analysis was used for multivariate analysis of 5-year overall survival for cases grouped into cytoplasm, nucleus, ECM or any location of TFPI-2 IHC positivity. Variables were age, FIGO staging and TFPI-2 expression. TFPI-2, tissue factor pathway inhibitor-2; IHC, immunohistochemistry; FIGO, Federation of Gynecology and Obstetrics; ECM, extracellular matrix; CI, confidence interval; HR, hazard ratio.

Table SII. Relationship between clinicopathological characteristics and TFPI-2 nuclear expression.

| Characteristics              | Negative (n=67) | Positive (n=10) | P-value |
|------------------------------|-----------------|-----------------|---------|
| Age in years, median (range) | 59 (36-75)      | 52.5 (42-72)    | P=0.091 |
| Parity (%)                   |                 |                 |         |
| No (0)                       | 31 (46.3)       | 5 (50.0)        | P=0.99  |
| Yes ( $\geq 1$ )             | 36 (53.7)       | 5 (50.0)        |         |
| Menopausal status            |                 |                 |         |
| Premenopause                 | 15 (22.4)       | 3 (30.0)        | P=0.691 |
| Postmenopause                | 52 (77.6)       | 7 (70.0)        |         |
| CA125 (U/ml)                 |                 |                 |         |
| <35                          | 23 (34.3)       | 1 (10.0)        | P=0.159 |
| $\geq 35$                    | 44 (65.7)       | 9 (90.0)        |         |
| FIGO                         |                 |                 |         |
| I/II                         | 51 (76.1)       | 10 (100)        | P=0.110 |
| III/IV                       | 16 (23.9)       | 0 (0)           |         |
| pT                           |                 |                 |         |
| pT1/2                        | 52 (77.6)       | 10 (100)        | P=0.195 |
| pT3                          | 15 (22.4)       | 0 (0)           |         |
| pN                           |                 |                 |         |
| pN0                          | 10 (14.9)       | 2 (20.0)        | P=0.466 |
| pN1                          | 1 (1.5)         | 0 (0)           |         |
| pNx                          | 56 (78.6)       | 31 (88.6)       |         |
| M                            |                 |                 |         |
| M0                           | 64 (95.3)       | 10 (100)        | P=0.99  |
| M1                           | 3 (4.5)         | 0 (0)           |         |

Mann-Whitney U test was used for continuous variables. Fisher's exact test was used for non-continuous variables. TFPI-2, tissue factor pathway inhibitor-2; CA125, cancer antigen 125; FIGO, Federation of Gynecology and Obstetrics.

Table SIII. Relationship between clinicopathological characteristics and TFPI-2 positivity in ECM.

| Characteristics              | Negative (n=42) | Positive (n=35) | P-value |
|------------------------------|-----------------|-----------------|---------|
| Age in years, median (range) | 58.5 (36-75)    | 57 (39-72)      | P=0.496 |
| Parity (%)                   |                 |                 |         |
| No (0)                       | 20 (47.6)       | 16 (45.7)       | P=0.99  |
| Yes (≥1)                     | 22 (52.4)       | 19 (54.3)       |         |
| Menopausal status            |                 |                 |         |
| Premenopause                 | 10 (23.8)       | 8 (22.9)        | P=0.99  |
| Postmenopause                | 32 (76.2)       | 27 (77.1)       |         |
| CA125 (U/ml)                 |                 |                 |         |
| <35                          | 14 (33.3)       | 10 (28.6)       | P=0.805 |
| ≥35                          | 28 (66.7)       | 25 (71.4)       |         |
| FIGO                         |                 |                 |         |
| I/II                         | 33 (78.6)       | 28 (80.0)       | P=0.99  |
| III/IV                       | 9 (21.4)        | 7 (20.0)        |         |
| pT                           |                 |                 |         |
| pT1/2                        | 34 (81.0)       | 28 (80.0)       | P=0.99  |
| pT3                          | 8 (19.0)        | 7 (20.0)        |         |
| pN                           |                 |                 |         |
| pN0                          | 5 (11.9)        | 7 (20.0)        | P=0.53  |
| pN1                          | 1 (2.4)         | 0 (0)           |         |
| pNx                          | 36 (85.7)       | 28 (80.0)       |         |
| M                            |                 |                 |         |
| M0                           | 41 (97.6)       | 33 (94.3)       | P=0.588 |
| M1                           | 1 (2.4)         | 2 (5.7)         |         |

Mann-Whitney U test was used for continuous variables. Fisher's exact test was used for non-continuous variables. TFPI-2, tissue factor pathway inhibitor-2; CA125, cancer antigen 125; FIGO, Federation of Gynecology and Obstetrics; ECM, extracellular matrix.

Table SIV. Relationship between the clinicopathological characteristics and TFPI-2 positivity in any subcellular fraction.

|                              | Negative (n=25) | Positive (n=52) | P-value |
|------------------------------|-----------------|-----------------|---------|
| Age in years, median (range) | 60 (36-74)      | 57 (39-75)      | P=0.105 |
| Parity (%)                   |                 |                 |         |
| No (0)                       | 13 (52.0)       | 23 (44.2)       | P=0.627 |
| Yes (≥1)                     | 12 (48.0)       | 29 (55.8)       |         |
| Menopausal status            |                 |                 |         |
| Premenopause                 | 4 (16.0)        | 14 (26.9)       | P=0.393 |
| Postmenopause                | 21 (84.0)       | 38 (73.1)       |         |
| CA125 (U/ml)                 |                 |                 |         |
| <35                          | 9 (36.0)        | 15 (28.8)       | P=0.603 |
| ≥35                          | 16 (64.0)       | 37 (71.2)       |         |
| FIGO                         |                 |                 |         |
| I/II                         | 19 (76.0)       | 42 (80.8)       | P=0.765 |
| III/IV                       | 6 (24.0)        | 10 (19.2)       |         |
| pT                           |                 |                 |         |
| pT1/2                        | 20 (80.0)       | 42 (80.8)       | P=0.99  |
| pT3                          | 5 (20.0)        | 10 (19.2)       |         |
| pN                           |                 |                 |         |
| pN0                          | 4 (16.0)        | 8 (15.4)        | P=0.538 |
| pN1                          | 1 (4.0)         | 0 (0)           |         |
| pNx                          | 20 (80.0)       | 44 (84.6)       |         |
| M                            |                 |                 |         |
| M0                           | 24 (96.0)       | 50 (96.0)       | P=0.99  |
| M1                           | 1 (4.0)         | 2 (3.8)         |         |

Mann-Whitney U test was used for continuous variables. Fisher's exact test was used for non-continuous variables. TFPI-2, tissue factor pathway inhibitor-2; CA125, cancer antigen 125; FIGO, Federation of Gynecology and Obstetrics.
